1 **Global genetic patterns reveal host tropism versus cross-taxon transmission of bat**  
2 **Betacoronaviruses**

3

4 **Michael G. Bacus<sup>1,5</sup>, Stephen Adrian H. Dayap<sup>1</sup>, Nikki Vanesa T. Tampon<sup>1</sup>, Marielle M. Udarbe<sup>1</sup>,**  
5 **Roberto P. Puentespina Jr.<sup>3</sup>, Sharon Yvette Angelina M. Villanueva<sup>2</sup>, Aleyla E. de Cadiz<sup>1,4, 5</sup>, Marion**  
6 **John Michael M. Achondo<sup>1,4</sup>, and Lyre Anni E. Murao<sup>1,4,5</sup>**

7

8 <sup>1</sup>Department of Biological Sciences and Environmental Studies, University of the Philippines Mindanao,  
9 Tugbok District, Davao City

10 <sup>2</sup>Department of Medical Microbiology, College of Public Health, University of the Philippines Manila

11 <sup>3</sup>Animal Solutions Veterinary Hospital, Bolcan, Davao City

12 <sup>4</sup>Wildlife-Human Interaction Studies, Ecological Research and Biodiversity Conservation Laboratory,  
13 University of the Philippines Mindanao, Tugbok District, Davao City

14 <sup>5</sup>Philippine Genome Center Mindanao, University of the Philippines Mindanao, Tugbok District, Davao  
15 City

16

17 **Abstract**

18 Emerging infectious diseases due to coronavirus (CoV) infections have received significant global  
19 attention in the past decade and have been linked to bats as the original source. The diversity, distribution,  
20 and host associations of bat CoVs were investigated to assess their potential for zoonotic transmission.  
21 Phylogenetic, network, and principal coordinate analysis confirmed the classification of betacoronaviruses  
22 (BetaCoVs) into five groups (2A to 2E) and a potentially novel group, with further division of 2D into five  
23 subgroups. The genetic co-clustering of BetaCoVs among closely related bats reflects host taxon-  
24 specificity with each bat family as the host for a specific BetaCoV group, potentially a natural barrier  
25 against random transmission. The divergent pathway of BetaCoV and host evolution suggests that the  
26 viruses were introduced just prior to bat dispersal and speciation. As such, deviant patterns were  
27 observed such as for 2D-IV, wherein cross-taxon transmission due to overlap in bat habitats and  
28 geographic range among genetically divergent African bat hosts could have played a strong role on their  
29 shared CoV lineages. In fact, a few bat taxa especially the subfamily Pteropodinae were shown to host  
30 diverse groups of BetaCoVs. Therefore, ecological imbalances that disturb bat distribution may lead to  
31 loss of host specificity through cross-taxon transmission and multi-CoV infection. Hence, initiatives that

32 minimize the destruction of wildlife habitats and limit wildlife-livestock-human interfaces are encouraged to  
33 help maintain the natural state of bat BetaCoVs in the wild.

34

35 **Key Words:** Coronaviruses, Bats, Phylogeny

36

### 37 **Importance**

38 Bat Betacoronaviruses (BetaCoVs) pose a significant threat to global public health and have been  
39 implicated in several epidemics such as the recent pandemic by severe acute respiratory syndrome  
40 coronavirus 2. Here, we show that bat BetaCoVs are predominantly host-specific, which could be a  
41 natural barrier against infection of other host types. However, a strong overlap in bat habitat and  
42 geographic range may facilitate viral transmission to unrelated hosts, and a few bat families have already  
43 been shown to host multi-CoV variants. We predict that continued disturbances on the ecological balance  
44 may eventually lead to loss of host specificity. When combined with enhanced wildlife-livestock-human  
45 interfaces, spillover to humans may be further facilitated. We should therefore start to define the  
46 ecological mechanisms surrounding zoonotic events. Global surveillance should be expanded and  
47 strengthened to assess the complete picture of bat coronavirus diversity and distribution and their  
48 potential to cause spillover infections.

49

### 50 **Introduction**

51 Emerging and re-emerging infectious diseases greatly affect public health and global economies  
52 (1). These diseases involve pathogenic strains that recently evolved, pathogens that infect human  
53 population for the first time, and pathogens that re-occur at higher frequency (2). Majority of these  
54 emerging infectious diseases are caused by microorganisms from non-human source or zoonotic  
55 pathogens from wild animals (3). In particular, emerging infectious diseases due to coronavirus (CoV)  
56 infections have been receiving significant global attention as exemplified by the severe acute respiratory  
57 syndrome coronavirus (SARS-CoV) outbreak in 2002-2003, the Middle East respiratory syndrome  
58 coronavirus (MERS CoV) outbreak in 2012, and the recent SARS-CoV2 pandemic which causes the

59 Coronavirus Disease of 2019 (COVID-19), all of which have been linked to bats as the original source (4-  
60 7).

61 Coronavirus (CoVs) are pleiomorphic, single-stranded positive-sense RNA viruses with three  
62 major structural proteins; a nucleocapsid protein (N) which functions in encapsidating genomic RNA and  
63 facilitating its incorporation into virions, a small integral membrane protein (M) with intrinsic membrane-  
64 bending properties that plays a central role in viral assembly, an envelope glycoprotein (E), and a large  
65 spike protein (S) which functions in viral entry and pathogenesis (8-11). CoVs are considered to have the  
66 largest genome among RNA viruses at approximately 27 to 30 kb (6). There are four genera by which  
67 CoVs are classified, namely Alphacoronaviruses, Betacoronaviruses, Gammacoronaviruses and  
68 Deltacoronaviruses (12). Betacoronaviruses (BetaCoVs) are of particular importance as the SARS-CoV,  
69 MERS-CoV, and SARS-CoV2 which have caused global epidemics belong to this lineage (5).  
70 Betacoronaviruses (BetaCoVs) are further classified into subgenera Embecovirus (also lineage 2A and  
71 includes Murine CoV and ChRCoV HKU24), Sarbecovirus (lineage 2B and includes SARS-related CoVs),  
72 Merbecovirus (lineage 2C and includes Ty-BatCoV HKU4, Pi-BatCoV HKU5, Hp-BatCoV HKU25, and  
73 MERS-related CoVs), Nobecovirus (lineage 2D and includes Ro-BatCoV HKU9 and Ro-BatCoV  
74 GCCDC1), and Hibecovirus (lineage 2E and includes Bat Hp-betaCoV Zhejiang2013) (13).

75 HCoV-229E and HCoV-OC43, both human coronaviruses (HCoVs), were first discovered in  
76 patients with mild respiratory illness (14). Two new species of HCoVs, the HCoV-NL63 and HCoV-HKU1  
77 were also discovered in 2004 and 2005, respectively (15). Disease types caused by HCoVs usually range  
78 from gastrointestinal infections, upper respiratory infections, and lower respiratory infections such as  
79 pneumonia (16). Further studies revealed that CoVs cause respiratory, enteric, hepatic and neurological  
80 diseases in animals like bats, birds, cats, dogs, pigs, mice, horses, and whales (17). Moreover, the  
81 SARS-CoV and MERS-CoV which have clear zoonotic origins have also been found to cause lower  
82 respiratory infections such as pneumonia. In particular, SARS-CoV has been associated with diffuse  
83 alveolar damage (DAD) and acute respiratory distress syndrome (ARDS), while MERS-CoV has been  
84 linked to renal failure (16). Recently, SARS-CoV2 has been reported to cause pneumonia, ARDS and  
85 multiple organ failure (7,18). CoVs can be transmitted via fecal-oral route, respiratory, as well as contact  
86 transmission (19). The spread of SARS-CoV has been primarily attributed to human-human transmission

87 via direct contact with respiratory droplets and exposure to fomites (20). Similarly, although no evidence  
88 of being sustained, human-human transmission has also been reported for MERS-CoV infections (21).  
89 The World Health Organization (WHO) released guidelines on how to limit human-human transmission,  
90 and reduce the risk of animal-human transmission in order to contain the rapidly spreading COVID-19  
91 disease that started in Wuhan, China (22).

92         There is increasing evidence for the role of bats as hosts of emerging pathogens, specifically  
93 viruses (23). Bats (Order: Chiroptera) are one of the most diverse and widely distributed animals, second  
94 only to rodents as the most speciose order in class Mammalia (24). They are classified into two suborders,  
95 Yinpterochiroptera, which include the false vampire bats (Megadermatidae), horseshoe bats  
96 (Rhinolophidae), and megabats or fruit bats (Pteropodidae); and Yangochiroptera which includes vesper  
97 bats (Vespertilionidae), sac-winged bats (Emballonuridae) and bulldog bats (Noctilionidae) (25). A  
98 significant number of CoVs can be found in bats, thus future spill-over events presents a constant threat  
99 to global health (26). In particular, emerging human coronaviruses have been linked to bat sources.  
100 Although camels were the source of the MERS-CoV in the Middle East, a coronavirus with 100% nt  
101 identity to that of human  $\beta$ -CoV 2c EMC/2012 isolated from a case-patient has been found in bats at a  
102 detection rate of 3.5% (27). SARS-like coronaviruses with 92% identity to that of human SARS-CoV  
103 isolates have also been detected in horseshoe bats in China. Three species of horseshoe bats from  
104 China namely *Rhinolophus pearsoni*, *R. pussilus* and *R. macrotis* demonstrated 28%, 33% and 78%  
105 SARS-CoV seroprevalence, respectively (28). Furthermore, SARS-CoV2 was found to be 96% identical  
106 to a bat coronavirus at the whole genome level (29). Bat CoVs (BtCoVs) comprise only 6% of the current  
107 CoV database although roughly 3,000 genetic lineages of BtCoVs are believed to circulate worldwide (30).  
108 It has also been suggested that future CoV outbreaks can be geographically predicted based on the  
109 specific bat species distribution (12). These highlight the need to expand our knowledge on BtCoVs,  
110 particularly on their diversity, distribution, host association, and evolution to understand their potential for  
111 zoonotic transmission. In this study, these parameters were assessed by classifying representative and  
112 unresolved BetaCoVs based on network and phylogenetic analysis of their RNA-dependent RNA  
113 polymerase sequences and evaluating patterns of geographic and host distribution. The analysis  
114 validated the current classification scheme of BetaCoVs with potentially novel groupings and

115 subgroupings identified. Comparative phylogenetics demonstrated a strong tendency towards host  
116 specificity of bat BetaCoVs although there was poor evidence of co-evolution with their hosts.

117

## 118 **Results**

### 119 **CoV detection in fruit bats from Southern Philippines**

120 Small and large intestine samples were collected from 49 bat individuals, 67.35% of which belong  
121 to the lesser dog-faced fruit bat *Cynopterus brachyotis* mostly from residential sites but also present in the  
122 agricultural and forest sites, 20.41% to *Rousettus amplexicaudatus* all from agricultural sites, and 10.2%  
123 to the long-tongued nectar bat *Macroglossus minimus* mostly collected from agricultural sites (Table 1).  
124 Only one (2.04%) cave nectar bat *Eonycteris spelaea* was collected, which was captured in a forest site.  
125 Out of the 49 fruit bats tested, seven (14.29%) were positive for BtCoV based on RT-nPCR detection, all  
126 of which were from the bat species *C. brachyotis* (Table 1). The species-level detection rate of CoV  
127 among the *C. brachyotis* samples was 21.2% (7 out of 33), with five individuals positive for the small  
128 intestine samples, and two other individuals positive for the large intestine samples (Table 1). Most of the  
129 CoV-positive bats were females and juveniles that were captured in residential and forest sites near a  
130 watershed reservation (supplemental data).

131

### 132 **Phylogenetic relationships of global CoVs**

133 A phylogenetic tree based on the partial RdRp gene sequences of CoVs obtained from this study  
134 and those mined from the NCBI database representing CoVs from various bat species, domestic and wild  
135 animals, as well as MERS-CoV, SARS-CoV and the SARS-CoV2, all from human patients was generated  
136 (Figure 1). Alpha and BetaCoVs each formed a distinct lineage from a common ancestor. Based on  
137 reference sequences, BetaCoVs diverged to five major phylogenetic clades classified as 2A  
138 (Embecovirus), 2B (Sarbecovirus), 2C (Merbecovirus), 2D (Nobecovirus), the recently proposed 2E  
139 (Hibecovirus) (13), and an unresolved clade which formed a genetic cluster distinct from the rest of the  
140 currently recognized BetaCoV subgroups. The same CoV groupings were supported by the network  
141 analysis using median-joining (Fig. 2A) and principal coordinate analysis using the distance matrix (Fig.  
142 2B), wherein sequences from each clade and sub-clade formed corresponding unique and distinct

143 clusters. Clade 2A was composed of human CoV (HCoV-OC43), porcine CoV (JL/2008), BtCoV  
144 (KX285045), and cattle CoV (NC\_003045). Clade 2B was composed of human SARS-CoV, SARS-CoV2,  
145 SARS-like CoVs, and unclassified BtCoVs, while clade 2C was composed of human MERS-CoV, camel  
146 MERS-like CoVs, BtCoVs such as HKU5-1, and unclassified BtCoVs. BtCoVs such as HKU9 and  
147 GCCDC1 formed clade 2D along with many unclassified BtCoVs, which further diverged into five distinct  
148 subgroupings 2D-I to 2D-V. Clade 2E was composed of Bat HP-BetaCoV/Zhejiang2013 which is currently  
149 the only recognized strain that belongs to the subgenus Hibecovirus (13). Finally, the unresolved clade is  
150 composed of unclassified BtCoVs. The phylogenetic tree captured the current classification scheme for  
151 BetaCoVs with novel information on Nobecovirus subclassification. However, deviant samples were also  
152 observed such as BetaCoVs from *Rhinolophus pusillus* and *Myotis dasycneme* that clustered with the  
153 AlphaCoV lineage as consistently demonstrated by the phylogenetic, network, and principal coordinate  
154 analyses (Fig. 1 and 2).

155

### 156 **Geographical distribution of bat CoVs**

157 The regional distribution of bat CoVs comprising the major clades and subclades were examined  
158 using the network analysis as shown in Figure 3 and Table 2. Results showed a heterogeneous  
159 geographical distribution of CoVs for most of the clades, except for the 2D-II and 2D-IV subclade, which  
160 were exclusively found in bats from Southeast Asia and Africa, respectively. In contrast, Clade 2B or the  
161 Sarbecoviruses was distributed in Europe, East Asia, Southeast Asia, and Australia. Clade 2C or the  
162 Merbecoviruses also had regionally diverse distribution in East Asia, Middle East, Europe, Africa, and  
163 South America. The fruit bat subclade 2D-I also has a wide distribution from Africa, East Asia, and  
164 Southeast Asia, 2D-III in East and Southeast Asia, and 2D-V in South and Southeast Asia. The single  
165 representative CoV in 2E was from East Asia. The mammalian CoVs in 2A were from East Asia,  
166 Southeast Asia and North America, while the unresolved clade consisted of unclassified BtCoVs from  
167 South America.

168

### 169 **Bat hosts of BetaCoV groups**

170           The bat hosts were further evaluated to determine common patterns within the BetaCoV lineages.  
171   Network analysis revealed a heterogenous composition in most of the clades or subclades in terms of the  
172   bat source (Fig. 4 and Table 2). Clade 2A included one BtCoV from *Pteropus alecto*. Clade 2B, which  
173   includes the human SARS-CoV and SARS-CoV2, was primarily composed of BtCoVs from horseshoe  
174   bats (family Rhinolophidae) belonging to *Rhinolophus* sp. (67%), along with some Old World leaf-nosed  
175   bats (family Hipposideridae) such as *Rhinonictis aurantia* and *Hipposideros galeritus*. Clade 2C of  
176   MERS-CoV was primarily composed of vesper bat hosts (family Vespertilionidae) such as *Pipistrellus* sp.,  
177   *Neoromicia capensis*, *Hypsugo savii*, *Nyctalus noctula*, *Eptesicus* sp., and *Vespertilio sinensis*, wherein  
178   majority were sampled from *Pipistrellus* (46%). A CoV from *Eumops glaucinus* of the free-tailed bats  
179   (family Molossidae) was also found to cluster with this group. Meanwhile, clade 2D consisted primarily of  
180   fruit bat hosts (family Pteropodidae) and showed distinct subgroupings. CoVs from subfamilies  
181   Rousettinae (*Rousettus* sp. and *Eonycteris spelaea*), Pteropodinae (*Dobsonia* sp.), and Macroglossini  
182   (*Macroglossus minimus*) formed the subclade 2D-I and 2D-III, majority of which were sampled from the  
183   genus *Rousettus* (67%). CoVs from subfamilies Cynopterinae (*Cynopterus* sp., *Dyacopterus spadiceus*,  
184   *Megaerops niphanae*, and *Ptenochirus jagori*), and Macroglossini (*Macroglossus minimus*) formed  
185   subclade 2D-II, with the genus *Cynopterus* (83%) as the predominantly sampled group. 2D-IV was  
186   composed of CoVs mostly sampled from the African bat *Eidolon helvum* (subfamily Pteropodinae) (32%),  
187   and the rest from other African fruit bats of subfamily Epomophorinae (*Micropteropus pusillus*,  
188   *Epomophorus* sp., *Epomops franqueti*, *Megaloglossus woermanni*, and *Mynonycteris angolensis*),  
189   subfamily Rousettinae (*R. aegyptiacus*), and family Hipposideridae (*Triaenops persicus*). Subclade 2D-V  
190   was composed solely of CoVs from *Pteropus* sp., commonly known as flying foxes (subfamily  
191   Pteropodinae), while the sole BtCoV representative in clade 2E has been detected in *Hipposideros pratti*  
192   (family Hipposideridae). Finally, the unresolved clade was composed of American leafed (family  
193   Phyllostomidae) and mustached (family Mormoopidae) bat hosts.

194

### 195 **Comparative phylogenetics of BetaCoVs and their bat hosts**

196           Phylogenetic analysis using the *cytB* gene was subsequently conducted to understand the  
197   evolutionary relationships of the bat hosts within BetaCoV lineages (Fig. 5A). The microbats (suborder

198 Yangochiroptera) formed two distinct lineages: the vesper bats versus the American leafed, mustached,  
199 and free-tailed bats. The megabats (suborder Yinpterochiroptera) also formed lineages corresponding to  
200 the three families: horseshoe, Old World leaf-nosed, and fruit bats. Furthermore, the fruit bats were sub-  
201 divided accordingly into Macroglossini, Pteropodinae, Cynopterinae, Rousettinae, and Epomophorinae  
202 lineages, except for *E. helvum* which was separated from the Pteropodinae group.

203 In general, there was a genetic clustering of bat hosts found within BetaCoV lineages. The 2B  
204 BetaCoVs was comprised of horseshoe and Old World leaf-nosed bat hosts that shared a common  
205 ancestor. A similar pattern was observed for 2C and the 2D subgroups. The 2C BetaCoVs was composed  
206 of vesper bat hosts, 2D-I/2D-III of Rousettinae bat hosts, 2D-II of Cynopterinae bat hosts, and 2D-IV of  
207 Epomophorinae bat hosts, wherein each bat group also formed their corresponding genetic clade. The  
208 2D-V subgroup was composed of solely *Pteropus* sp. which belongs to Pteropodinae. Finally, the  
209 unresolved CoV clade was represented by American leafed and mustached microbat hosts (*P. davysii* and  
210 *A. lituratus*) that clustered with a common ancestor. Meanwhile, 2E was represented by only one bat host:  
211 *Hipposideros* sp. of the Old World leaf nosed bats.

212 However, some deviations were also noted. For example, bat hosts that belong to genetically  
213 unrelated taxa were mixed in some BetaCoV groups. The Mollosidae bat *Eumops glaucinus* was found in  
214 2C BetaCoV of vesper bats, the Pteropodinae *Dobsonia moluccensis* in 2D-I of Rousettinae bats, the  
215 Pteropodinae *Macroglossus minimus* both in 2D-II of Cynopterinae bats and 2D-III of Rousettinae bats,  
216 and the Pteropodinae *Eidolon helvum*, Rousettinae *Rousettus aegyptiacus*, and Hipposideridae/Old  
217 World leaf-nosed bat *Trianeops persicus* in 2D-IV of Epomophorinae bats. Looking at the host, certain bat  
218 families were observed to harbor BetaCoVs that belong to various lineages. The Rousettinae bats were  
219 found to carry both 2D-I/2D-III and 2D-IV BetaCoVs, and the Old World fruit bats 2B, 2D-IV, and 2E. The  
220 subfamily Pteropodinae also hosted Nobecoviruses from various groups such as 2A (*P. alecto*), 2D-I (*D.*  
221 *moluccensis*), 2D-II (*D. spadiceus* and *M. minimus*), 2D-III (*M. minimus*), 2D-IV (*E. helvum*), and 2D-V  
222 (*Pteropus* sp.).

223 The divergence of the bats and their BetaCoVs were compared to evaluate common evolutionary  
224 pathways (Fig. 5B). The vesper microbats diverged as a separate group from the rest of the bats. The  
225 remaining bats further diverged into different clades: the first one comprised of the other microbat families



226 (American leafed, mustached and free-tailed bats), and the second clade splitting into horseshoe bats,  
227 Old World leaf-nosed bats, and fruit bats, with the former two sharing a much recent common ancestor.  
228 For the corresponding viruses however, the evolutionary pattern was different. The unresolved microbat  
229 CoVs were the first to diverge from the rest of the bat BetaCoVs. The vesper microbat CoVs (2C) on the  
230 other hand appear to have diverged together with the Old World leaf-nosed megabat CoVs (2E). Finally,  
231 the mammalian CoVs (2A) emerged from a lineage of bat BetaCoVs.

232

## 233 **Discussion**

234 A global analysis was conducted for BetaCoVs of human, animal, and bat origins including a  
235 complete set of representatives from the updated CoV classification (13). The major clades inferred from  
236 the generated Bayesian phylogenetic tree using partial RdRp sequences was consistent with previously  
237 reported classification of BetaCoVs (2A or Embecoviruses, 2B or Sarbecoviruses, 2C or Merbecoviruses,  
238 2D or Nobecoviruses, and 2E or Hibecoviruses) using whole genome sequences of representative strains  
239 (12) and was able to position formerly unclassified bat CoVs. A new clade of unclassified bat BetaCoVs  
240 that is genetically distinct from the currently recognized groups was also observed. This classification can  
241 correct the GenBank annotation of deviant samples such as the BetaCoVs that grouped with AlphaCoVs,  
242 and add information on the currently unclassified BetaCoVs in GenBank. This is also the first report on  
243 the comprehensive classification of Nobecoviruses, of which there are currently only two recognized  
244 groups: Ro-BtCoV HKU9 and Ro-BtCoV GCCDC1 (12). Our analysis of unclassified BetaCoVs suggests  
245 that Nobecovirus diversity may have been underestimated in previous reports. We therefore propose the  
246 subclassification of Nobecoviruses into five subgroups (2D-I to 2D-V), which can help update surveillance  
247 records and facilitate monitoring of CoV populations in the wild.

248 The congruent association between the genetic clustering of bat CoVs and their bat hosts at  
249 different taxonomic levels (family, subfamily, and genus) and regardless of location suggests bat taxon-  
250 specific BetaCoV lineages: horseshoe and Old World leaf-nosed bats for 2B Sarbecoviruses, vesper bats  
251 for 2C Merbecoviruses, fruit bats for 2D Nobecoviruses, and the closely related American leafed and  
252 mustached bats for the new BetaCoV clade. Similar trends were observed upon further analysis of the  
253 Nobecoviruses and their subclades: 2D-I and 2D-III BetaCoVs were found mostly in Rousettinae bats,

254 2D-II in Cynopterinae bats, and 2D-V in *Pteropus* bats. A conclusive finding could not be generated from  
255 the single representative Old World leaf-nosed bat for 2E Hibecovirus. These findings support previous  
256 reports (31) which we have expanded here to identify the specific bat taxon associated with each  
257 BetaCoV group and a more extensive analysis of fruit bat CoVs. Network analysis showed no clear trends  
258 in the geographical distribution of closely related BetaCoVs except for 2D-IV, which is composed of four  
259 genetically distinct bat hosts (family Pteropodidae subfamily Pteropodinae, Epomophorinae, and  
260 Rousettinae; and family Hipposideridae), but all of which are found in Africa. Hence, host specificity could  
261 play a major role in BetaCoV diversity, except for 2D-IV for which geography may have a stronger  
262 influence.

263 Host specificity is uncommon in other bat-infecting viruses such as Paramyxoviruses and  
264 Papillomaviruses, which have been reported to have prevalent host switches (32,33). Indeed, bats have a  
265 predominant viral sharing network, suggesting that cross-species transmission events are common (34).  
266 In contrast, our findings support a previously proposed hypothesis that CoVs limit cross-species  
267 transmission within related bat taxa (31), which is indicative of a preferred adaptation to a certain range of  
268 hosts. Various lines of evidence have indicated bat-specific infectivity of CoVs. In one study, BtCoVs from  
269 primary infection of *C. brachyotis* had a reduced level of replication when experimentally inoculated to  
270 *Rousettus leschenaultii* (35). Similarly, the SARS-like WIV1-CoV, which was isolated from *Rhinolophus*  
271 *sinicus* bats and demonstrated positive replication in *R. sinicus* cell lines, showed weak infection in  
272 *Rousettus* sp. bats and cell lines (36-38). Indeed, our analysis showed that BetaCoVs from *Rousettus* sp.  
273 (2D-I, 2D-III or 2D-IV) are genetically distinct from *Cynopterus* sp. (2D-II) or *Rhinolophus* sp. (2B).  
274 Analysis of bat SARS-like CoV proteins demonstrated the absence of any selective pressure for evolution  
275 (39), suggesting that bat CoVs have already reached optimal fitness in their host. Factors that limit  
276 transmission to a different host taxon include cell surface receptors, the immune response, and  
277 replication fitness (40). These factors may serve as important natural barriers in the transmission of bat  
278 BetaCoVs, which can advantageously limit host jumping and co-infection, which otherwise may generate  
279 new virus strains with the ability to switch animal hosts (41,42).

280 Although bat BetaCoVs are host taxon-specific, their evolutionary pathways are different from  
281 bats, as has been reported in another study (31), suggesting that the virus did not have a long-term co-

282 evolution with its host. Instead, this is indicative that the currently circulating viruses may have been  
283 introduced relatively recently, i.e. to the most recent common ancestors of each bat taxon but prior to  
284 global dispersion and speciation, during which the virus acquired adaptation to its host. The recent  
285 introduction of BetaCoVs in bats implies that other factors may have had the opportunity to influence  
286 virus-host dynamics. In the succeeding discussions, we will present two deviant phenomena that  
287 exemplify this: cross-taxon transmission of CoVs and bat hosts with multi-CoV lineages.

288 We provide genetic evidence for cross-taxon transmission as indicated by genetically unrelated  
289 bats that host BetaCoVs of the same lineage. For example, the Mollosidae bat *Eumops glaucinus* and  
290 vesper bats harbored CoVs that belong to 2C. *E. glaucinus* has a wide distribution in South America that  
291 overlaps with the vesper bat *Eptesicus sp.* (43,44), which is an opportunity for cross-species transmission  
292 of CoVs. Another example is the Pteropodinae bat *Dobsonia moluccensis*, *Dyacopterus spadiceus*, and  
293 *M. minimus* that carried Nobecoviruses from various subgroups. *Dobsonia sp.* and Rousettinae bats are  
294 primarily cave dwellers that have been documented to co-roost in the same cave habitat (45-49), which  
295 could explain their shared BetaCoVs from lineage 2D-I. Evidence of forage site overlap has also been  
296 documented for *Cynopterus sp.* and other Pteropodinae bats such as *M. minimus* which also feeds on  
297 banana and palm trees, and *Dyacopterus spadiceus* which have been documented to feed together with  
298 *Cynopterus horsfieldii* in the same foliage site (45). Here, we reported that these Cynopterinae and  
299 Pteropodinae bats have BetaCoVs that commonly belong to 2D-II. A final example is 2D-IV, which is  
300 composed of four genetically distinct bat hosts from Epomophorinae, Pteropodinae (*E. helvum*),  
301 Rousettinae (*R. aegyptiacus*), and Hipposidridae/Old World leaf-nosed bats (*T. persicus*). The diverse  
302 hosts of 2D-IV could be explained by overlaps in foraging, roosting, and distribution of African bats. For  
303 example, *Rousettus aegyptiacus* has been reported to share the same foraging site with *Epomophorus*  
304 *gambianus* (50). Meanwhile, *Eidolon helvum* roosts gregariously, exhibiting an annual migration pattern  
305 as a function of food supply and has a wide distribution range in the African continent (51-53), which  
306 overlaps with the distribution and range of other Epomophorinae fruit bats in Africa. *Triaenops persicus* is  
307 also widely distributed in Eastern Africa, Middle East, and South Western Asia (54,55). Altogether, these  
308 imply that cross-taxon transmission of CoVs is most likely facilitated by close interactions brought about  
309 by an overlap of roosting and foraging habitat as well as geographic range of the bat hosts.

310 Our analysis also revealed that certain bat taxa such as Rousettinae, Hipposideridae (Old World  
311 fruit bats), and Pteropodinae harbor multi-CoV lineages. We hypothesize that certain host factors such as  
312 conserved cellular receptor motifs unique to some bat families are accessible to various forms of the CoV  
313 Spike protein (S) specifically the corresponding receptor-binding motif (RBM), thereby predisposing them  
314 to infection by various CoV lineages. It has been reported that different receptor-binding S1 subunit C-  
315 terminal domains (S1-CTDs) from different coronavirus lineages can recognize the same receptor (56).  
316 For example, the Lys353 amino acid in the angiotensin-converting enzyme 2 (ACE 2) plays a crucial role  
317 for the binding of the SARS-CoV and the HCoV-NL63, both of which are very divergent coronaviruses,  
318 the former being a Betacoronavirus, and the latter belonging to the alphacoronavirus lineage.  
319 Independent evolution of different RBDs in coronaviruses could lead to the recognition of the same virus-  
320 binding hotspot (56). Bats that can host a wide range of CoVs have the potential to propagate novel  
321 viruses. It is therefore recommended that the BtCoV database be expanded through sustained  
322 surveillance efforts covering more bat species especially from these three families in order to determine  
323 their full range of CoV lineages.

324 The phylogenetic analysis in this study points to bats as potential origins of other mammalian  
325 CoVs (2A). Switching to another taxon would require specific genetic alterations that will facilitate  
326 infection of a different host species (40). This entails a strong selection pressure, and all the more when  
327 switching to other animal hosts (35-38). A good demonstration of this is the evolution of human SARS-  
328 CoV which is believed to have occurred in a stepwise fashion, with the spike protein undergoing early  
329 selective pressure probably to mediate the switch from animal to human hosts, followed by the RdRp in  
330 the late stages to facilitate a more efficient replication in humans (42). Furthermore, the human MERS-  
331 CoV EMC/2012 was found to replicate in *Artibeus jamaicensis* bats, as well as in various cell lines from  
332 different bat families that have never been reported to host MERS-CoV strains (37,57). Viral strains with  
333 broad-spectrum tropism such as human SARS and MERS CoV are the result of an evolutionarily  
334 acquired ability that combined the use of new receptors, host immune evasion, and efficient replication in  
335 various host species (36,38,57,58). Anthropogenic activities such as climate changes affect the  
336 distribution of previously geographically restricted disease vectors (59). Continued ecological imbalances  
337 that alter bat distribution may eventually lead to loss of host specificity for bat BetaCoVs through cross-

338 taxon transmission and adaptation of multiple CoV lineages. Diverse wildlife-livestock-human interfaces  
339 created by urbanization (60) could further increase the selection pressure resulting to spillover events in  
340 human populations. For example, SARS-CoV likely evolved to infect humans through a series of  
341 transmission events due to close or sustained contact between humans and animals in a wildlife market  
342 in China (61). Furthermore, the recent SARS-CoV2 outbreak in China has been reported to originate from  
343 a seafood market in Wuhan with exposure to wild animals (62). Considering all these factors, another  
344 novel human CoV outbreak originating from bats is imminent. These highlight the need to monitor and  
345 maintain the natural state of CoVs in the wild by strengthening routine surveillance of circulating CoVs,  
346 proper urban planning to minimize the destruction of wildlife habitats, and limiting wildlife-livestock-human  
347 interfaces such as by controlling wildlife consumption.

348         The detection rate of BtCoVs has been reported at a range of 2-30% in bats from various Asian  
349 countries, wherein our 14.29% detection rate in Southern Philippines is within range (63-67). Moreover,  
350 the 21.2% detection rate of CoVs in *Cynopterus brachyotis* from this study is lower compared to two  
351 separate studies in Northern Philippines at 37% and 39%, respectively (35,63), but higher compared to  
352 other Southeast Asian countries such as Thailand (11%) and Singapore (5.6%) (65,66). *C. brachyotis* is  
353 locally abundant and widely distributed throughout urbanized and secondary forests in both South and  
354 Southeast Asian regions, and have a high fruit species diversity in its diet (68). It is therefore  
355 recommended to explore the incidence of CoVs in the wild population of *C. brachyotis* in the Philippines,  
356 which may present a higher risk for future spillover infection in animal and/or human populations due to  
357 their presence in urban communities. On the other hand, the absence of CoV detection in other fruit bat  
358 species in this study does not rule out the possibility of these bats as reservoirs. This could have been  
359 due to sampling bias, i.e. non-*Cynopterus* species comprised only ~30% of the captured bats, which  
360 highlights the need to strengthen surveillance efforts for BtCoVs in individual countries to estimate the  
361 true burden of viral diversity and distribution. Should there be a novel zoonotic CoV arising from fruit bats  
362 such as *C. brachyotis*, it is predicted to be genetically distinct from SARS-CoV, SARS-CoV2, or MERS-  
363 CoV. However, this novel virus may be just as virulent or highly contagious.

364

365 **Materials and Methods**

366 **Bat sampling and tissue collection**

367 BtCoV samples from Southern Philippines were obtained from an exploratory surveillance. Five  
368 sampling sites consisting of two agricultural sites, two residential sites and one forest site were selected  
369 for bat collection at Malagos, Davao City. Forty-nine individuals, all fruit bats, non-threatened and non-  
370 endemic, were collected through purposive sampling for two nights on November 16 and 17, 2018 and  
371 their morphometric measurements were recorded. Bat samples collected were identified using the Key to  
372 the Bats of the Philippines by Ingle and Heaney (1992) (69). Bat samples were anesthetized through an  
373 intraperitoneal injection of 0.1 ml tiletamine-zolazepam and euthanized via cardiac exsanguination to  
374 obtain small and large intestine samples. Prior to the conduct of the study, Wildlife Gratuitous Permit  
375 (WGP No. XI-2018-07) and IACUC approval (protocol no.: 2018-019) were secured from the Department  
376 of Environment and Natural Resources XI and the Institutional Animal Care and Use Committee of the  
377 University of the Philippines Manila, respectively.

378

379 **Coronavirus detection**

380 Genomic RNA was extracted from small intestine and large intestine samples using the SV Total  
381 RNA Isolation kit (Promega, USA) according to the manufacturer's instructions. All RNA extracts were  
382 subjected to reverse transcription polymerase chain reaction (RT-PCR) using the one-step RT-PCR kit  
383 (Qiagen, USA) and PanCoV F2 (5'-AAR TTY TAY GGH GGY TGG-3') and PanCoV R1 (5'-GAR CAR  
384 AAT TCA TGH GGD CC-3') primers (70). The RT-PCR mix was prepared as follows: 0.4 µl One-step RT-  
385 PCR enzyme mix, 0.4 µl 10 mM dNTP mix, 2 µl 5x One-step RT-PCR buffer, 0.2 µl of 10 µM each of  
386 PanCoV F2 and PanCoV R1 primers, 4.0 µl of RNase-Free water and 3 µl RNA extracts for a total of 10  
387 µl per reaction. The cycling conditions were as follows: 30 minutes at 50°C, 15 minutes at 95°C, 40 cycles  
388 at 94°C for 40 seconds, 48°C for 40 seconds and 72°C for 1 minute. The final extension was at 72°C for  
389 10 minutes. Nested-PCR was subsequently performed to amplify a 435 bp bat specific region of the RNA  
390 dependent RNA polymerase (RdRp) gene using in-house designed primers BatCoV F1 (5'-  
391 TGACAGAGCACTGCCCAA-3') and BatCoV R1 (5'-TTGTAACAAACAACGCCATC-3') (71), and the 2X  
392 Taq Master Mix (Vivantis, Subang Jaya, Malaysia). The nPCR mix was prepared as follows: 5 µl 2X Taq  
393 Master Mix, 0.4 µl of 10 µM each of BatCoV F1 and BatCoV R1 primers, 2 µl one-step RT-PCR product

394 and 2.2 µl nuclease-free water for a total of 10 µl per reaction. The cycling conditions for nPCR were as  
395 follows: 2 minutes at 94°C, 35 cycles of 40 seconds at 94°C, 40 seconds at 48°C, 1 minute at 72°C, and a  
396 final extension for 10 minutes at 72°C. The expected 435 bp amplicon of the BtCoV RdRp gene was  
397 visualized through electrophoresis using a 1.5% agarose gel.

398

### 399 **Sequence processing**

400 Positive amplicons with an expected size of 435 bp were excised and purified using the GF-1  
401 AmbiClean Kit (Vivantis, Subang Jaya, Malaysia) and were sent to Macrogen, Korea for standard DNA  
402 sequencing. Sequences were cleaned using the FinchTV software (Geospiza, USA) and distance  
403 analysis was performed using the Basic Local Alignment Search Tool (BLAST) of the National Center for  
404 Biotechnology Information (NCBI) (<http://www.ncbi.nlm.nih.gov/>).

405

### 406 **Phylogenetic analysis of global CoV sequences**

407 CoV sequences obtained from this study, including 223 RdRp sequences of BtCoVs, 22 Human  
408 CoV sequences which include SARS, MERS and the 2019-nCoV isolated from patients, and 19 CoV  
409 sequences from other animal hosts such as camels, cats, dogs and pigs that were obtained from the  
410 National Center for Biotechnology Information (NCBI) database were used for phylogenetic analysis.  
411 Multiple sequence alignment was performed with the MAFFT software using the default algorithm and the  
412 leave gappy regions function. The final alignment was trimmed and cleaned in MEGA 7 software in order  
413 to come up with a 325 bp alignment of the CoV partial RdRp gene. The best phylogenetic model was  
414 calculated using jModelTest v.2.1.10 (72). The executable xml file for phylogenetic analysis was prepared  
415 using BEAUTi v.1.10.4 with the GTR+G+I DNA substitution and site heterogeneity model, which had the  
416 lowest Bayesian Information Criterion (BIC) as previously calculated in jModelTest, a length of chain of  
417 100 million, strict molecular clock, and coalescent constant size model. The rest of the tree priors were  
418 set to the default value. Phylogenetic inference was performed using BEAST v.1.10.4 and the log files  
419 were evaluated using Tracer v.1.7.1 to see if the estimated sampling size (ESS) values for most of the  
420 continuous parameters are sufficient (>200) (73,74). A Maximum Clade Credibility (MCC) tree was  
421 generated using TreeAnnotator v.1.10.4. and the resulting MCC tree was visualized with FigTree v.1.4.4

422 (<http://tree.bio.ed.ac.uk/software/figtree>). Results from phylogenetic analysis were compared with  
423 principal coordinate analysis using the pairwise distance matrix of the CoV sequences using Past 3 (75)  
424 and with the network analysis using median joining in terms of major clades, geographical region and  
425 host genus.

426

#### 427 **Phylogenetic analysis of bats**

428 *Cytochrome B (Cyt B)* gene of 43 different bat species representing the bat hosts of the  
429 betacoronavirus lineage were obtained from the NCBI database. Phylogenetic analysis was performed in  
430 the same manner as previously described for CoV sequences using a GTR+G+I DNA substitution and  
431 heterogeneity model, which had the lowest Bayesian Information Criterion (BIC) as calculated in  
432 jModelTest. The resulting bat phylogenetic trees were plotted against the CoV phylogenetic tree to  
433 assess virus and host evolutionary congruence.

434

#### 435 **Acknowledgement**

436 This research was funded by the Department of Science and Technology - Philippine Council for Health  
437 Research and Development through the Regional Health Research and Development Council XI Grant  
438 No. 18-1572. The authors would like to thank the Local Government Units of Malagos Davao City, the  
439 Malagos Garden, the Philippine Eagle Foundation, Mr. Kemuel Libre Jr., Yancy Yurong and Alex Tiongco  
440 for all the assistance and support in during the field sampling of this study.

441

#### 442 **Conflict of Interest**

443 The authors declare no conflict of interest. The funders had no role in the design of the study; in the  
444 collection, analyses, or interpretation of data; in the writing of the manuscript, or in the decision to publish  
445 the results.

446

#### 447 **References**

- 448 1. Lederberg, J., Hamburg, M. A., & Smolinski, M. S. (Eds.). (2003). *Microbial threats to health:  
449 emergence, detection, and response*. National Academies Press.



- 450 2. Morens, D. M., Folkers, G. K., & Fauci, A. S. (2004). The challenge of emerging and re-emerging  
451 infectious diseases. *Nature*, 430(6996), 242-249.
- 452 3. Taylor, L. H., Latham, S. M., & Woolhouse, M. E. (2001). Risk factors for human disease  
453 emergence. *Philosophical Transactions of the Royal Society of London. Series B: Biological  
454 Sciences*, 356(1411), 983-989.
- 455 4. Hui, D. S., I Azhar, E., Madani, T. A., Ntoumi, F., Kock, R., Dar, O., ... & Zumla, A. (2020). The  
456 continuing 2019-nCoV epidemic threat of novel coronaviruses to global health—The latest 2019  
457 novel coronavirus outbreak in Wuhan, China. *International Journal of Infectious Diseases*, 91,  
458 264-266.
- 459 5. Lu, R., Zhao, X., Li, J., Niu, P., Yang, B., Wu, H., ... & Bi, Y. (2020). Genomic characterisation  
460 and epidemiology of 2019 novel coronavirus: implications for virus origins and receptor  
461 binding. *The Lancet*.
- 462 6. Anthony, S. J., Gilardi, K., Menachery, V. D., Goldstein, T., Ssebide, B., Mbabazi, R., ... &  
463 Petrosov, A. (2017). Further evidence for bats as the evolutionary source of Middle East  
464 respiratory syndrome coronavirus. *MBio*, 8(2), e00373-17.
- 465 7. Jin, Y., Yang, H., Ji, W., Wu, W., Chen, S., Zhang, W., & Duan, G. (2020). Virology, epidemiology,  
466 pathogenesis, and control of COVID-19. *Viruses*, 12(4), 372.
- 467 8. Siddell, S., Wege, H., & Ter Meulen, V. (1983). The biology of coronaviruses. *Journal of General  
468 Virology*, 64(4), 761-776.
- 469 9. spaan, W., Cavanagh, D., & Horzinek, M. C. (1988). Coronaviruses: structure and genome  
470 expression. *Journal of General Virology*, 69(12), 2939-2952.
- 471 10. Neuman, B. W., Kiss, G., Kunding, A. H., Bhella, D., Baksh, M. F., Connelly, S., ... & Siddell, S. G.  
472 (2011). A structural analysis of M protein in coronavirus assembly and morphology. *Journal of  
473 structural biology*, 174(1), 11-22.
- 474 11. Gallagher, T. M., & Buchmeier, M. J. (2001). Coronavirus spike proteins in viral entry and  
475 pathogenesis. *Virology*, 279(2), 371-374.
- 476 12. Wong, A. C., Li, X., Lau, S. K., & Woo, P. C. (2019). Global epidemiology of bat  
477 coronaviruses. *Viruses*, 11(2), 174.
- 478 13. ICTV Taxonomy History: Cornidovirineae. Available online: [https://talk.ictvonline.org/taxonomy/p/  
479 taxonomy-history?taxnode\\_id=20186105](https://talk.ictvonline.org/taxonomy/p/taxonomy-history?taxnode_id=20186105) (accessed on 12 February 2020).
- 480 14. Hamre, D., & Procknow, J. J. (1966). A new virus isolated from the human respiratory  
481 tract. *Proceedings of the Society for Experimental Biology and Medicine*, 121(1), 190-193.
- 482 15. van der Hoek, L., Pyrc, K., Jebbink, M. F., Vermeulen-Oost, W., Berkhout, R. J., Wolthers, K.  
483 C., ... & Berkhout, B. (2004). Identification of a new human coronavirus. *Nature medicine*, 10(4),  
484 368-373.
- 485 16. Gralinski, L. E., & Baric, R. S. (2015). Molecular pathology of emerging coronavirus  
486 infections. *The Journal of pathology*, 235(2), 185-195.
- 487 17. de Groot, R. J., Cowley, J. A., Enjuanes, L., Faaberg, K. S., Perlman, S., Rottier, P. J., ... &  
488 Gorbalenya, A. E. (2012). Virus taxonomy, the 9th report of the International Committee on  
489 Taxonomy of Viruses.

- 490 18. Chen, N., Zhou, M., Dong, X., Qu, J., Gong, F., Han, Y., ... & Yu, T. (2020). Epidemiological and  
491 clinical characteristics of 99 cases of 2019 novel coronavirus pneumonia in Wuhan, China: a  
492 descriptive study. *The Lancet*.
- 493 19. Goh, G. K. M., Dunker, A. K., & Uversky, V. N. (2012). Understanding viral transmission behavior  
494 via protein intrinsic disorder prediction: coronaviruses. *Journal of pathogens*, 2012.
- 495 20. Anderson, R. M., Fraser, C., Ghani, A. C., Donnelly, C. A., Riley, S., Ferguson, N. M., ... & Hedley,  
496 A. J. (2004). Epidemiology, transmission dynamics and control of SARS: the 2002–2003  
497 epidemic. *Philosophical Transactions of the Royal Society of London. Series B: Biological  
498 Sciences*, 359(1447), 1091-1105.
- 499 21. Hui, D. S., Azhar, E. I., Kim, Y. J., Memish, Z. A., Oh, M. D., & Zumla, A. (2018). Middle East  
500 respiratory syndrome coronavirus: risk factors and determinants of primary, household, and  
501 nosocomial transmission. *The Lancet Infectious Diseases*, 18(8), e217-e227.
- 502 22. World Health Organization: Novel coronavirus (2019-nCoV) situation report-10. Available online:  
503 [https://www.who.int/docs/default-source/coronaviruse/situation-reports/20200130-sitrep-10-  
504 ncov.pdf?sfvrsn=d0b2e480\\_2](https://www.who.int/docs/default-source/coronaviruse/situation-reports/20200130-sitrep-10-ncov.pdf?sfvrsn=d0b2e480_2) (accessed on 12 February 2020).
- 505 23. Donaldson, E. F., Haskew, A. N., Gates, J. E., Huynh, J., Moore, C. J., & Frieman, M. B. (2010).  
506 Metagenomic analysis of the viromes of three North American bat species: viral diversity among  
507 different bat species that share a common habitat. *Journal of virology*, 84(24), 13004-13018.
- 508 24. Burgin, C. J., Colella, J. P., Kahn, P. L., & Upham, N. S. (2018). How many species of mammals  
509 are there?. *Journal of Mammalogy*, 99(1), 1-14.
- 510 25. Teeling, E. C., Madsen, O., Van Den Bussche, R. A., de Jong, W. W., Stanhope, M. J., &  
511 Springer, M. S. (2002). Microbat paraphyly and the convergent evolution of a key innovation in  
512 Old World rhinolophoid microbats. *Proceedings of the National Academy of Sciences*, 99(3),  
513 1431-1436.
- 514 26. Drexler, J. F., Corman, V. M., & Drosten, C. (2014). Ecology, evolution and classification of bat  
515 coronaviruses in the aftermath of SARS. *Antiviral research*, 101, 45-56.
- 516 27. Memish, Z. A., Mishra, N., Olival, K. J., Fagbo, S. F., Kapoor, V., Epstein, J. H., ... & Kapoor, A.  
517 (2013). Middle East respiratory syndrome coronavirus in bats, Saudi Arabia. *Emerging infectious  
518 diseases*, 19(11), 1819.
- 519 28. Li, W., Shi, Z., Yu, M., Ren, W., Smith, C., Epstein, J. H., ... & Zhang, J. (2005). Bats are natural  
520 reservoirs of SARS-like coronaviruses. *Science*, 310(5748), 676-679.
- 521 29. Zhou, P., Yang, X. L., Wang, X. G., Hu, B., Zhang, L., Zhang, W., ... & Chen, H. D. (2020).  
522 Discovery of a novel coronavirus associated with the recent pneumonia outbreak in humans and  
523 its potential bat origin. *bioRxiv*.
- 524 30. Anthony, S. J., Johnson, C. K., Greig, D. J., Kramer, S., Che, X., Wells, H., ... & Karesh, W.  
525 (2017). Global patterns in coronavirus diversity. *Virus evolution*, 3(1).
- 526 31. Leopardi, S., Holmes, E. C., Gastaldelli, M., Tassoni, L., Priori, P., Scaravelli, D., ... & De  
527 Benedictis, P. (2018). Interplay between co-divergence and cross-species transmission in the  
528 evolutionary history of bat coronaviruses. *Infection, Genetics and Evolution*, 58, 279-289.
- 529 32. Drexler, J. F., Corman, V. M., Müller, M. A., Maganga, G. D., Vallo, P., Binger, T., ... & Seebens,  
530 A. (2012). Bats host major mammalian paramyxoviruses. *Nature communications*, 3(1), 1-13.
- 531 33. García-Pérez, R., Ibáñez, C., Godínez, J. M., Aréchiga, N., Garin, I., Pérez-Suárez, G., ... &  
532 Bravo, I. G. (2014). Novel papillomaviruses in free-ranging Iberian bats: no virus–host co-

- 533 evolution, no strict host specificity, and hints for recombination. *Genome biology and*  
534 *evolution*, 6(1), 94-104.
- 535 34. Luis, A. D., O'Shea, T. J., Hayman, D. T., Wood, J. L., Cunningham, A. A., Gilbert, A. T., ... &  
536 Webb, C. T. (2015). Network analysis of host–virus communities in bats and rodents reveals  
537 determinants of cross-species transmission. *Ecology letters*, 18(11), 1153-1162.
- 538 35. Watanabe, S., Masangkay, J. S., Nagata, N., Morikawa, S., Mizutani, T., Fukushi, S., ... &  
539 Taniguchi, S. (2010). Bat coronaviruses and experimental infection of bats, the  
540 Philippines. *Emerging infectious diseases*, 16(8), 1217.
- 541 36. Ge, X. Y., Li, J. L., Yang, X. L., Chmura, A. A., Zhu, G., Epstein, J. H., ... & Zhang, Y. J. (2013).  
542 Isolation and characterization of a bat SARS-like coronavirus that uses the ACE2  
543 receptor. *Nature*, 503(7477), 535-538.
- 544 37. Lau, S. K., Fan, R. Y., Luk, H. K., Zhu, L., Fung, J., Li, K. S., ... & Chan, K. H. (2018). Replication  
545 of MERS and SARS coronaviruses in bat cells offers insights to their ancestral origins. *Emerging*  
546 *microbes & infections*, 7(1), 1-11.
- 547 38. Van Doremalen, N., Schäfer, A., Menachery, V. D., Letko, M., Bushmaker, T., Fischer, R. J., ... &  
548 Munster, V. J. (2018). SARS-like coronavirus WIV1-CoV does not replicate in Egyptian fruit bats  
549 (*Rousettus aegyptiacus*). *Viruses*, 10(12), 727.
- 550 39. Tang, X., Li, G., Vasilakis, N., Zhang, Y., Shi, Z., Zhong, Y., ... & Zhang, S. (2009). Differential  
551 stepwise evolution of SARS coronavirus functional proteins in different host species. *BMC*  
552 *evolutionary biology*, 9(1), 52.
- 553 40. Longdon, B., Brockhurst, M. A., Russell, C. A., Welch, J. J., & Jiggins, F. M. (2014). The evolution  
554 and genetics of virus host shifts. *PLoS pathogens*, 10(11).
- 555 41. Hon, C. C., Lam, T. Y., Shi, Z. L., Drummond, A. J., Yip, C. W., Zeng, F., ... & Leung, F. C. C.  
556 2008. Evidence of the recombinant origin of a bat severe acute respiratory syndrome (SARS)-like  
557 coronavirus and its implications on the direct ancestor of SARS coronavirus. *Journal of*  
558 *virology*, 82(4), 1819-1826.
- 559 42. Pyrc, K., Dijkman, R., Deng, L., Jebbink, M. F., Ross, H. A., Berkhout, B., Van der Hoek, L.  
560 2006. Mosaic structure of human coronavirus NL63, one thousand years of evolution. *Journal of*  
561 *molecular biology*, 364(5), 964-973.
- 562 43. Barquez, R. & Diaz, M. 2016. *Eumops glaucinus* . The IUCN Red List of Threatened Species  
563 2016. e.T87994083A22026467. [https://dx.doi.org/10.2305/IUCN.UK.2016-](https://dx.doi.org/10.2305/IUCN.UK.2016-3.RLTS.T87994083A22026467)  
564 3.RLTS.T87994083A22026467. en. Downloaded on 11 March 2020.
- 565 44. Davis, W. B. (1966). Review of South American bats of the genus *Eptesicus*. *The Southwestern*  
566 *Naturalist*, 245-274.
- 567 45. Mickleburgh, S.P., Hutson, A.M., & Racey, P.A. 1992. Old World fruit bats. *an action plan for their*  
568 *conservation*. Gland Switzerland: IUCN, 263.
- 569 46. Bhat, H. R., Sreenivasan, M. A., & JACOB, P. G. 1980. Breeding cycle of *Eonycteris spelaea*  
570 (Dobson, 1871)(Chiroptera, Pteropidae, Macroglossinae) in India. *Mammalia*, 44(3), 343-  
571 348.
- 572 47. Marshall, A. G. 1983. Bats, flowers and fruit: evolutionary relationships in the Old World.  
573 *Biological journal of the Linnean Society*, 20(1), 115-135.
- 574 48. Gadiana, L. P. M. P. M. 2004. The Philippine bare-backed fruit bat *Dobsonia chapmani* Rabor,  
575 1952: Rediscovery and conservation status on Cebu Island. *Silliman Journal*, 45(2).

- 576 49. Tsang, S.M. 2016. *Dobsonia moluccensis*. The IUCN Red List of Threatened Species 2016:  
577 e.T84882605A22033630. [http://dx.doi.org/10.2305/IUCN.UK.2016-](http://dx.doi.org/10.2305/IUCN.UK.2016-3.RLTS.T84882605A)  
578 22033630.en. Downloaded on 02 December 2019.
- 579 50. Thomas, D. W., & Fenton, M. B. (1978). Notes on the dry season roosting and foraging behaviour  
580 of *Epomophorus gambianus* and *Rousettus aegyptiacus* (Chiroptera: Pteropodidae). *Journal of*  
581 *Zoology*, 186(3), 403-406.
- 582 51. Richter, H. V., & Cumming, G. S. (2006). Food availability and annual migration of the  
583 straw-colored fruit bat (*Eidolon helvum*). *Journal of Zoology*, 268(1), 35-44.
- 584 52. Webala, P. W., Musila, S., & Makau, R. (2014). Roost occupancy, roost site selection and diet of  
585 straw-coloured fruit bats (Pteropodidae: *Eidolon helvum*) in western Kenya: the need for  
586 continued public education. *Acta Chiropterologica*, 16(1), 85-94.
- 587 53. Ossa, G., Kramer-Schadt, S., Peel, A. J., Scharf, A. K., & Voigt, C. C. (2012). The movement  
588 ecology of the straw-colored fruit bat, *Eidolon helvum*, in sub-Saharan Africa assessed by stable  
589 isotope ratios. *PLoS One*, 7(9).
- 590 54. Goodman, S. M., & Benstead, J. P. (2003). *Natural history of Madagascar*. University of Chicago  
591 Press.
- 592 55. Ranivo, J., & Goodman, S. M. (2006). Révision taxinomique des *Triaenops* malgaches  
593 (Mammalia, Chiroptera, Hipposideridae). *ZOOSYSTEMA-PARIS*-, 28(4), 963.
- 594 56. Li, F. (2015). Receptor recognition mechanisms of coronaviruses: a decade of structural  
595 studies. *Journal of virology*, 89(4), 1954-1964.
- 596 57. Munster, V. J., Adney, D. R., Van Doremalen, N., Brown, V. R., Miazgowicz, K. L., Milne-Price,  
597 S., ... & De Wit, E. (2016). Replication and shedding of MERS-CoV in Jamaican fruit bats  
598 (*Artibeus jamaicensis*). *Scientific reports*, 6(1), 1-10.
- 599 58. Anthony, S. J., Gilardi, K., Menachery, V. D., Goldstein, T., Ssebide, B., Mbabazi, R., ... &  
600 Petrosov, A. (2017). Further evidence for bats as the evolutionary source of Middle East  
601 respiratory syndrome coronavirus. *MBio*, 8(2), e00373-17.
- 602 59. Coleman, C. M., & Frieman, M. B. (2014). Coronaviruses: important emerging human  
603 pathogens. *Journal of virology*, 88(10), 5209-5212.
- 604 60. Hassell, J. M., Begon, M., Ward, M. J., & Fèvre, E. M. (2017). Urbanization and disease  
605 emergence: dynamics at the wildlife–livestock–human interface. *Trends in ecology &*  
606 *evolution*, 32(1), 55-67.
- 607 61. Sheahan, T., Rockx, B., Donaldson, E., Sims, A., Pickles, R., Corti, D., & Baric, R. (2008).  
608 Mechanisms of zoonotic severe acute respiratory syndrome coronavirus host range expansion in  
609 human airway epithelium. *Journal of virology*, 82(5), 2274-2285.
- 610 62. Wuhan Municipal Health Commission. Wuhan Municipal Commission of Health and Health on  
611 Pneumonia of New Coronavirus Infection. Available  
612 online: <http://wjw.wuhan.gov.cn/front/web/showDetail/2020012009077> (accessed on 20  
613 February 2020).
- 614 63. Tsuda, S., Watanabe, S., Masangkay, J. S., Mizutani, T., Alviola, P., Ueda, N., Horimoto, T. 2012.  
615 Genomic and serological detection of bat coronavirus from bats in the Philippines. *Archives of*  
616 *virology*, 157(12), 2349-2355.
- 617 64. Woo, P. C., Lau, S. K., Li, K. S., Poon, R. W., Wong, B. H., Tsoi, H. W., ... & Yuen, K. Y. 2006.  
618 Molecular diversity of coronaviruses in bats. *Virology*, 351(1), 180-187.

- 619 65. Wacharapluesadee, S., Duengkae, P., Rodpan, A., Kaewpom, T., Maneeorn, P., Kanchanasaka,  
620 B., Pidthong, A. 2015. Diversity of coronavirus in bats from Eastern Thailand. *Virology*  
621 *journal*, 12(1), 57.
- 622 66. Lacroix, A., Duong, V., Hul, V., San, S., Davun, H., Omaliss, K., ... & Khamvavong, K. 2017.  
623 Genetic diversity of coronaviruses in bats in Lao PDR and Cambodia. *Infection, Genetics and*  
624 *Evolution*, 48, 10-18.
- 625 67. Lim, X. F., Lee, C. B., Pascoe, S. M., How, C. B., Chan, S., Tan, J. H., Wang, L. F. 2019.  
626 Detection and characterization of a novel bat-borne coronavirus in Singapore using multiple  
627 molecular approaches. *Journal of General Virology*, 100(10), 1363-1374.
- 628 68. Mohd-Azlan, J., Alek Tuen, A., Abd Rahman, M. R. 2010. Preliminary assessment of activity  
629 pattern and diet of the lesser dog faced fruit bat *Cynopterus brachyotis* in a Dipterocarp Forest,  
630 Sarawak, Borneo. *Tropical Ecology*, 51(2), 297.
- 631 69. Ingle, N. R., & Heaney, L. R. (1992). A key to the bats of the Philippine Islands. *Publication (USA)*.
- 632 70. Hu, H., Jung, K., Wang, Q., Saif, L. J., & Vlasova, A. N. (2018). Development of a one-step RT-  
633 PCR assay for detection of pancoronaviruses ( $\alpha$ -,  $\beta$ -,  $\gamma$ -, and  $\delta$ -coronaviruses) using newly  
634 designed degenerate primers for porcine and avianfecal samples. *Journal of virological*  
635 *methods*, 256, 116-122.
- 636 71. Tampon, N. V. T., Rabaya, Y. M. C., Malbog, K. M. A., Burgos, S. C., Bacus, M. G., Libre Jr, K., ...  
637 & Murao, L. A. E. (2020). First Molecular Evidence for Bat Betacoronavirus in  
638 Mindanao. *Philippine Journal of Science*, 149(1), 109-112.
- 639 72. Posada, D. (2008). jModelTest: phylogenetic model averaging. *Molecular biology and*  
640 *evolution*, 25(7), 1253-1256.
- 641 73. Suchard, M. A., Lemey, P., Baele, G., Ayres, D. L., Drummond, A. J., & Rambaut, A. (2018).  
642 Bayesian phylogenetic and phylodynamic data integration using BEAST 1.10. *Virus*  
643 *evolution*, 4(1), vey016.
- 644 74. Rambaut, A., Drummond, A. J., Xie, D., Baele, G., & Suchard, M. A. (2018). Posterior  
645 summarization in Bayesian phylogenetics using Tracer 1.7. *Systematic biology*, 67(5), 901-904.
- 646 75. Hammer, Ø., Harper, D. A., & Ryan, P. D. (2001). PAST: Paleontological statistics software  
647 package for education and data analysis. *Palaeontologia electronica*, 4(1), 9.

648

649 Table 1. Summary of fruit bats collected from Malagos, Davao City and CoV detection.

| Bat species               | Collection sites                     | No. of samples | No. positive for CoV |                 | Total positive for COV (%) |
|---------------------------|--------------------------------------|----------------|----------------------|-----------------|----------------------------|
|                           |                                      |                | small intestine      | large intestine |                            |
| <i>C. brachyotis</i>      | residential,<br>agricultural, forest | 33             | 5                    | 2               | 7 (21.2)                   |
| <i>R. amplexicaudatus</i> | agricultural                         | 10             | 0                    | 0               | 0 (0)                      |
| <i>M. minimus</i>         | residential,<br>agricultural         | 5              | 0                    | 0               | 0 (0)                      |
| <i>E. spelaea</i>         | forest                               | 1              | 0                    | 0               | 0 (0)                      |

650

651 Table 2. Summary of betacoronavirus groups and their corresponding regions and hosts

| <b>Total</b>         |                               | <b>49</b>                        | <b>5</b>                    | <b>2</b>                    | <b>7 (14.3)</b>  |               |
|----------------------|-------------------------------|----------------------------------|-----------------------------|-----------------------------|------------------|---------------|
| <b>BetaCoV group</b> | <b>Regions</b>                | <b>Bat hosts</b>                 | <b>Suborder<sup>1</sup></b> | <b>Family</b>               | <b>Subfamily</b> |               |
| 2A                   | SE Asia                       | <i>Pteropus alecto</i>           | Yin                         | Pteropodidae                | Pteropodinae     |               |
| 2B                   | Australia                     | <i>Hipposideros galeritus</i>    | Yin                         | Hipposideridae              | n/a              |               |
|                      | Europe                        | <i>Rhinolophus cornutus</i>      | Yin                         | Rhinolophidae               | n/a              |               |
|                      | E Asia                        | <i>Rhinolophus ferrumequinum</i> |                             |                             | Rhinolophidae    | n/a           |
|                      |                               | <i>Rhinolophus</i>               | Yin                         |                             |                  |               |
|                      | SE Asia                       | <i>hipposideros</i>              |                             |                             | Rhinolophidae    | n/a           |
|                      |                               | <i>Rhinolophus pusilus</i>       | Yin                         |                             | Rhinolophidae    | n/a           |
|                      |                               | <i>Rhinolophus sinicus</i>       | Yin                         |                             | Rhinolophidae    | n/a           |
|                      |                               | <i>Rhinonictes aurantia</i>      | Yin                         |                             | Hipposideridae   | n/a           |
|                      |                               |                                  |                             |                             |                  |               |
| 2C                   | Africa                        | <i>Eptesicus isabellinus</i>     | Yang                        | Vespertilionidae            | n/a              |               |
|                      | E Asia                        | <i>Eptesicus nilssonii</i>       | Yang                        | Vespertilionidae            | n/a              |               |
|                      | M East                        | <i>Eptesicus serotinus</i>       | Yang                        | Vespertilionidae            | n/a              |               |
|                      | S America                     | <i>Eumops glaucinus</i>          | Yang                        |                             | Molossidae       | n/a           |
|                      |                               | <i>Hypsugo savii</i>             | Yang                        |                             | Vespertilionidae | n/a           |
|                      |                               | <i>Neoromicia capensis</i>       | Yang                        |                             | Vespertilionidae | n/a           |
|                      |                               | <i>Nyctalus noctula</i>          | Yang                        |                             | Vespertilionidae | n/a           |
|                      |                               | <i>Pipistrellus abramus</i>      | Yang                        |                             | Vespertilionidae | n/a           |
|                      |                               | <i>Pipistrellus hesperidus</i>   | Yang                        |                             | Vespertilionidae | n/a           |
|                      |                               | <i>Pipistrellus kuhlii</i>       | Yang                        |                             | Vespertilionidae | n/a           |
|                      |                               | <i>Pipistrellus nathusii</i>     | Yang                        |                             | Vespertilionidae | n/a           |
|                      |                               | <i>Pipistrellus pipistrellus</i> | Yang                        |                             | Vespertilionidae | n/a           |
|                      |                               | <i>Pipistrellus pygmaeus</i>     | Yang                        |                             | Vespertilionidae | n/a           |
|                      |                               | <i>Vespertilio senesis</i>       | Yang                        |                             | Vespertilionidae | n/a           |
|                      |                               | 2D-I                             | Africa                      | <i>Dobsonia moluccensis</i> | Yin              | Pteropodidae  |
| E Asia               | <i>Eonycteris spelaea</i>     |                                  | Yin                         | Pteropodidae                | Rousettinae      |               |
|                      | <i>Rousettus</i>              |                                  | Yin                         |                             |                  |               |
| SE Asia              | <i>amplexicaudatus</i>        |                                  |                             |                             | Pteropodidae     | Rousettinae   |
|                      | <i>Rousettus leschenautii</i> |                                  | Yin                         |                             | Pteropodidae     | Rousettinae   |
|                      | <i>Rousettus sp.</i>          | Yin                              |                             | Pteropodidae                | Rousettinae      |               |
| 2D-II                | SE Asia                       | <i>Cynopterus brachyotis</i>     | Yin                         | Pteropodidae                | Cynopterinae     |               |
|                      |                               | <i>Cynopterus horsefieldii</i>   | Yin                         | Pteropodidae                | Cynopterinae     |               |
|                      |                               | <i>Cynopterus sphinx</i>         | Yin                         | Pteropodidae                | Cynopterinae     |               |
|                      |                               | <i>Dyacopterus spadiceus</i>     | Yin                         |                             | Pteropodidae     | Pteropodinae  |
|                      |                               | <i>Macroglossus minimus</i>      | Yin                         |                             | Pteropodidae     | Macroglossini |
|                      |                               | <i>Ptenochirus jagori</i>        | Yin                         |                             | Pteropodidae     | Cynopterinae  |

|            |           |                                |         |                           |               |              |              |
|------------|-----------|--------------------------------|---------|---------------------------|---------------|--------------|--------------|
| 2D-III     | E Asia    | <i>Eonycteris spelaea</i>      | Yin     | Pteropodidae              | Rousettinae   |              |              |
|            | SE Asia   | <i>Macroglossus minimus</i>    | Yin     | Pteropodidae              | Macroglossini |              |              |
|            |           | <i>Rousettus leschenautii</i>  | Yin     | Pteropodidae              | Rousettinae   |              |              |
| 2D-IV      | Africa    | <i>Eidolon helvum</i>          | Yin     | Pteropodidae              | Pteropodinae  |              |              |
|            |           | <i>Epomophorus gambianus</i>   | Yin     | Pteropodidae              | Epomophorinae |              |              |
|            |           | <i>Epomophorus labiatus</i>    | Yin     | Pteropodidae              | Epomophorinae |              |              |
|            |           | <i>Epomops franqueti</i>       | Yin     | Pteropodidae              | Epomophorinae |              |              |
|            |           | <i>Megaloglossus woermanii</i> | Yin     | Pteropodidae              | Epomophorinae |              |              |
|            |           | <i>Micropterus pusillus</i>    | Yin     | Pteropodidae              | Epomophorinae |              |              |
|            |           | <i>Myonycteris angolensis</i>  | Yin     | Pteropodidae              | Epomophorinae |              |              |
|            |           | <i>Rousettus aegyptiacus</i>   | Yin     | Pteropodidae              | Rousettinae   |              |              |
|            |           | <i>Triaenops persicus</i>      | Yin     | Hipposideridae            | n/a           |              |              |
|            |           | 2D-V                           | S Asia  | <i>Pteropus alecto</i>    | Yin           | Pteropodidae | Pteropodinae |
|            |           |                                | SE Asia | <i>Pteropus giganteus</i> | Yin           | Pteropodidae | Pteropodinae |
| 2E         | E Asia    | <i>Hipposideros pratti</i>     | Yin     | Hipposideridae            | n/a           |              |              |
| unresolved | S America | <i>Artibeus lituratus</i>      | Yang    | Phyllostomidae            | n/a           |              |              |
|            |           | <i>Pteronotus davyi</i>        | Yang    | Mormoopidae               | n/a           |              |              |

652 <sup>1</sup>Yin= Yinpterochiroptera, Yang= Yangochiroptera

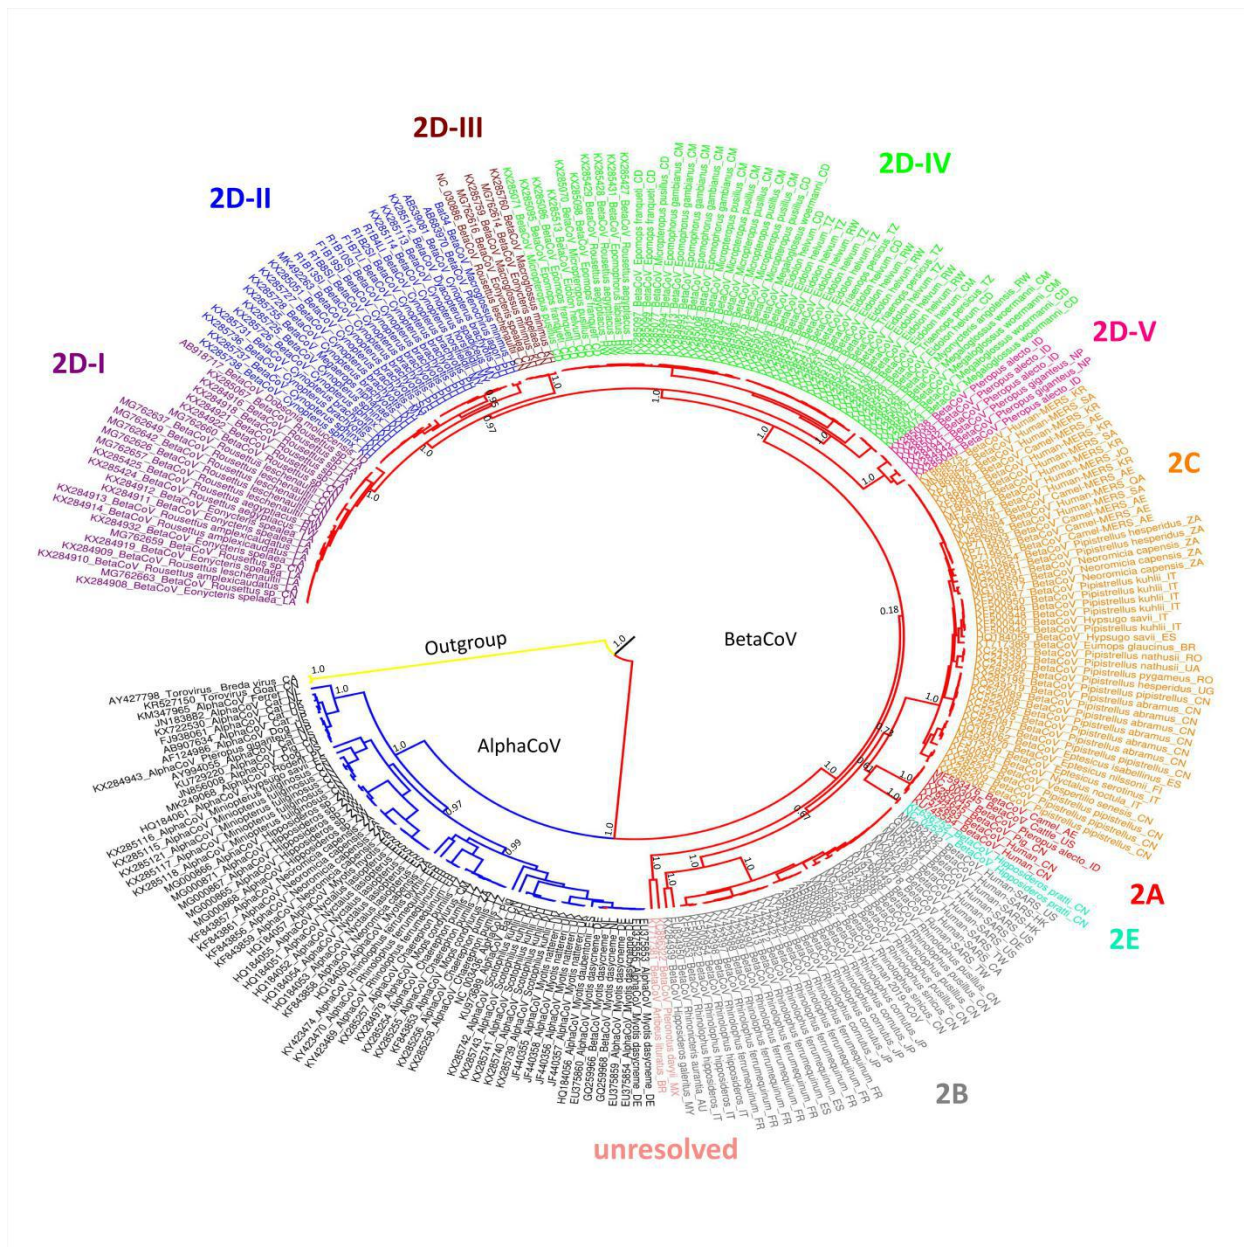

653  
 654 Figure 1. Bayesian phylogenetic tree of a 325 bp portion of the COV RdRp gene sequences available in  
 655 GenBank and the samples obtained from this study. The betacoronavirus lineage is shown in red lines,  
 656 while the alphacoronaviruses are shown in blue lines. The outgroup is represented by torovirus as shown  
 657 in yellow line. Posterior values of the major divergence points are shown in the branches.

658

659



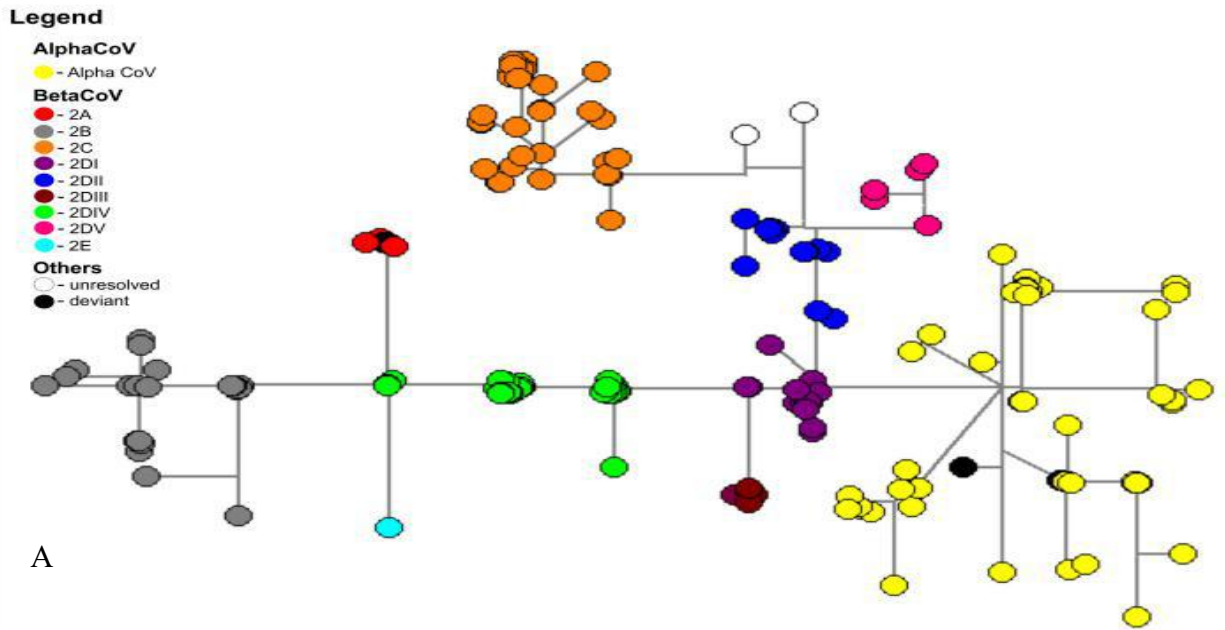

A

660

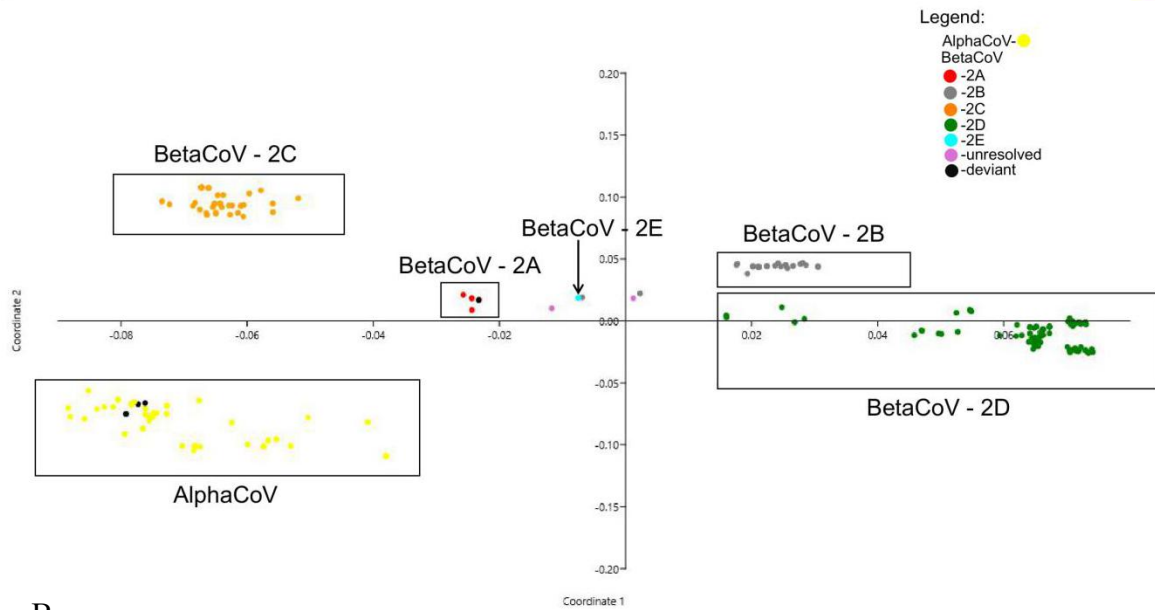

B

661

662

663

664

665

Figure 2. Genetic clustering of global CoVs using, a) network analysis through median joining of RdRp gene sequences, and b) principal coordinate analysis of the distance matrix of the RdRp gene sequences.

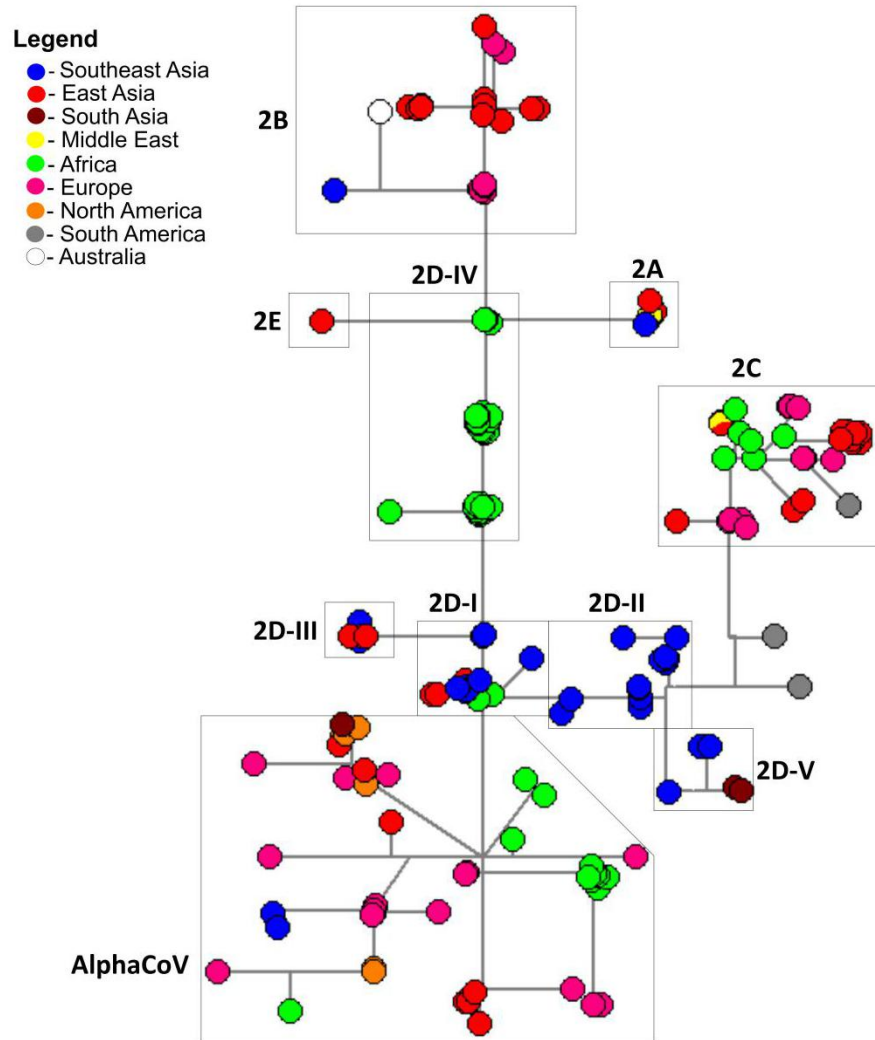

666  
667  
668  
669

Figure 3. Regional distribution of CoVs from bats, domestic and wild animals, as well as humans using network analysis of RdRp gene sequences.

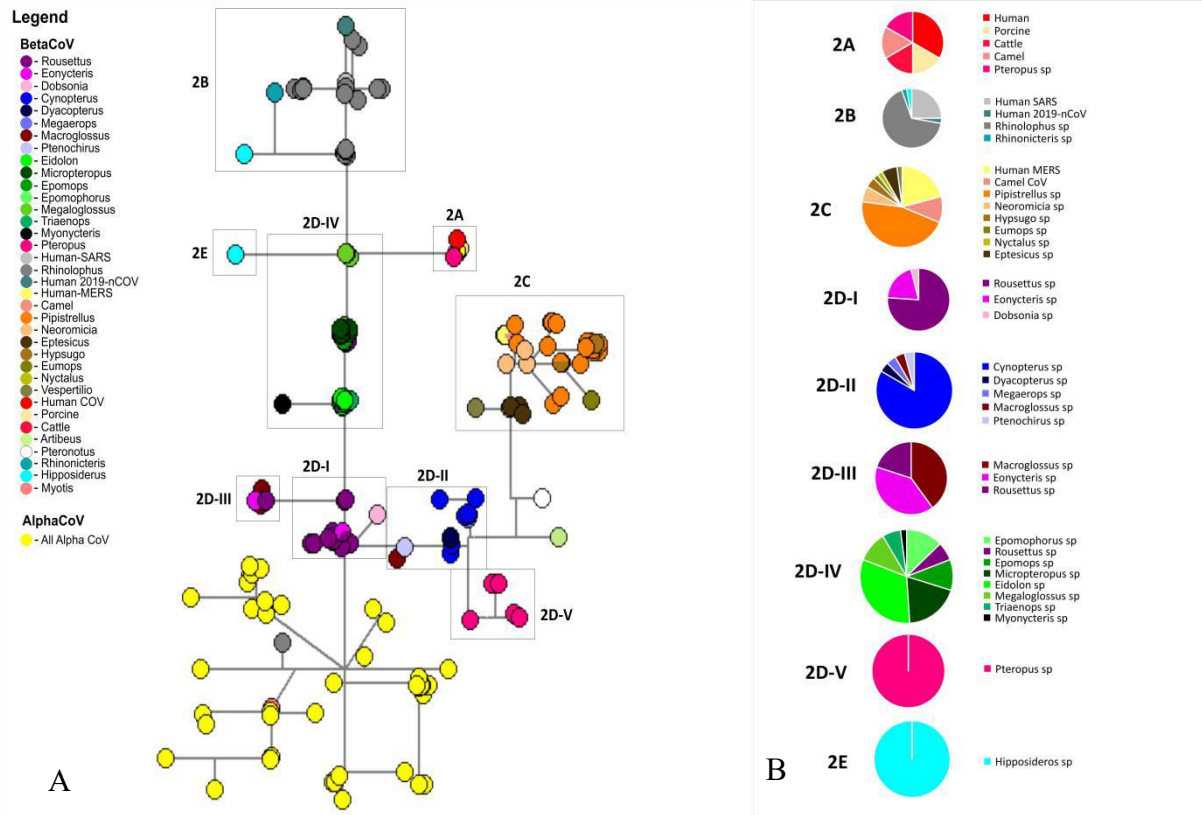

670  
671  
672

Figure 4. Host composition of betacoronavirus lineages as illustrated in the (a) network analysis of RdRp gene sequences, and (b) pie chart distribution of hosts per clade or subclade.

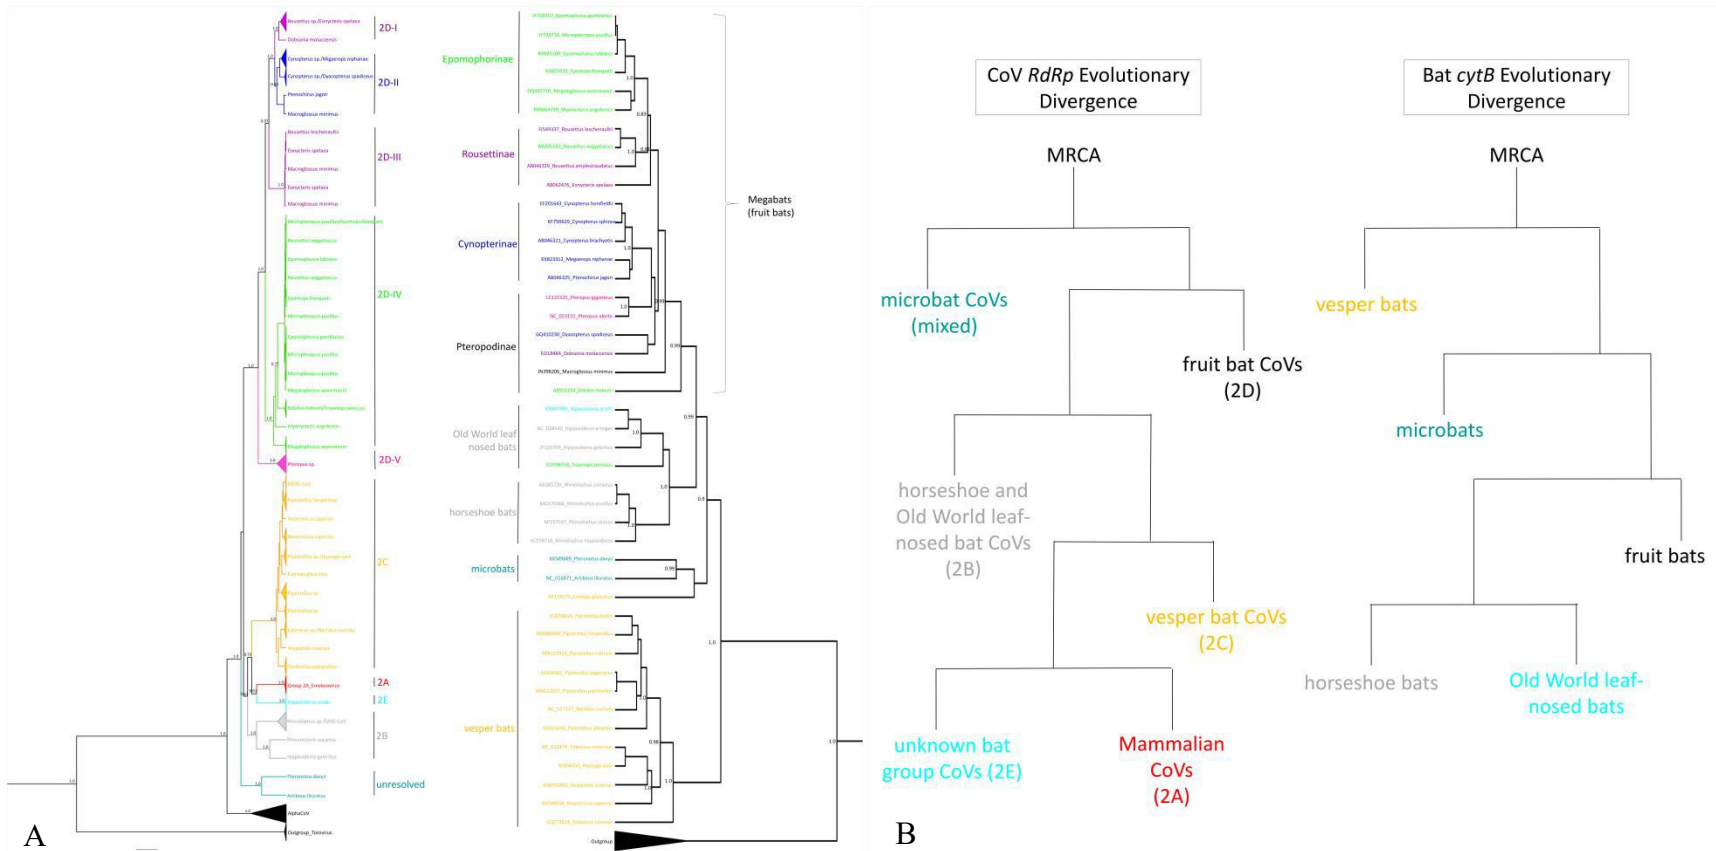

673  
 674 Figure 5. Phylogenetic relationships between CoVs (*RdRp* gene) and their bat host (*Cyt B* gene), A) bayesian phylogenetic trees generated using  
 675 bayesian inference (BEAST v.1.10.4) with the GTR+G+I DNA substitution and site heterogeneity model, strict molecular clock and coalescent  
 676 constant size, with posterior values of the well supported clades written in the nodes, B) evolutionary divergence patterns of CoVs and their bat  
 677 hosts based from the generated Bayesian phylogenetic trees.
